# Supplementary material
Source: publisher figshare collection journal article supplement (https://asha.figshare.com/articles/dataset/_/8285786)
Supplement: Supplementary file 1 [file 1]

### Supplemental Material S3. Nonword Repetition Task (NWR; Dollaghan & Campbell, 1998).

#### Demographics

Norms for Nonword Repetition Task (NWR; Dollaghan & Campbell, 1998) included children who were attending regular education only. Children were excluded from the standardization sample if they were receiving any special education services (e.g., resource, reading, speech-language services); were receiving English as a second language service; participated in an extended learning program; or had been diagnosed with autism spectrum disorder (ASD), attention-deficit/hyperactivity disorder (ADHD), or a psychiatric disorder.

| <b>Ethnic Category</b>   | <b>Females</b>    | <b>Males</b>      | <b>Total</b> |
|--------------------------|-------------------|-------------------|--------------|
| Hispanic                 | 2 (3.4%)          | 3 (4.1%)          | 5 (3.8%)     |
| Not Hispanic             | 57 (96.6%)        | 67 (91.8%)        | 124 (93.9%)  |
| Unknown                  | —                 | 3 (4.1%)          | 3 (2.3%)     |
| <b>ETHNIC TOTAL</b>      | <b>59 (44.7%)</b> | <b>73 (55.3%)</b> | <b>132</b>   |
|                          |                   |                   |              |
| <b>Racial Categories</b> |                   |                   |              |
| American Indian          | —                 | 1 (1.4%)          | 1 (0.8%)     |
| Asian                    | 2 (3.4%)          | 4 (5.5%)          | 6 (4.5%)     |
| Pacific Islander         | —                 | 2 (2.7%)          | 2 (1.5%)     |
| Black                    | 3 (5.1%)          | 1 (1.4%)          | 4 (3.0%)     |
| White                    | 54 (91.5%)        | 62 (84.9%)        | 116 (87.9%)  |
| More than one race       | —                 | —                 | —            |
| Unknown                  | —                 | 3 (4.1%)          | 3 (2.3%)     |
| <b>RACIAL TOTAL</b>      | <b>59 (44.7%)</b> | <b>73 (55.3%)</b> | <b>132</b>   |

#### NWR Consistency

Interrater consistency was performed by randomly selecting 36 participants from the Redmond standardization sample and relistening and rescored the audio recording of the NWR administration. Analyzed using Pearson’s *r*.

*n* = 36

|            | <b>#agreements/(#agreements + #disagreements) × 100</b> | <b><i>r</i></b> |
|------------|---------------------------------------------------------|-----------------|
| <b>NWR</b> | 96.67%                                                  | .89**           |

\**p* < .05. \*\**p* < .01. \*\*\**p* < .001 (two tailed).

## NWR ( $n = 132$ ) Raw Scores

| AGE      | <i>N</i> | <i>M</i> | <i>SD</i> | RANGE  | 15 <sup>TH</sup><br>%ILE | 10 <sup>TH</sup><br>%ILE | 5 <sup>TH</sup><br>%ILE |
|----------|----------|----------|-----------|--------|--------------------------|--------------------------|-------------------------|
| 5;0–5;11 | 20       | 84.00    | 6.94      | 72–98  | 76.15                    | 75.10                    | 72.15                   |
| 6;0–6;11 | 30       | 86.20    | 9.03      | 59–96  | 75.60                    | 71.20                    | 65.05                   |
| 7;0–7;11 | 33       | 88.79    | 6.25      | 77–98  | 79.00                    | 78.00                    | 77.00                   |
| 8;0–8;11 | 37       | 90.41    | 5.55      | 79–99  | 83.70                    | 82.20                    | 79.00                   |
| 9;0–9;11 | 12       | 92.42    | 5.09      | 82–100 | 85.80                    | 83.20                    | 82.00                   |

## NWR Standard Score Conversion Tables: 5;0–5;11

$n = 20$  (11 boys, 9 girls)

| Raw Score | Standard Score | Percentile | Raw Score | Standard Score | Percentile | Raw Score | Standard Score | Percentile |
|-----------|----------------|------------|-----------|----------------|------------|-----------|----------------|------------|
| 0         | 40             | < 0.1      | 40        | 40             | < 0.1      | 80        | 91             | 27         |
| 1         | 40             | < 0.1      | 41        | 40             | < 0.1      | 81        | 93             | 32         |
| 2         | 40             | < 0.1      | 42        | 40             | < 0.1      | 82        | 95             | 37         |
| 3         | 40             | < 0.1      | 43        | 40             | < 0.1      | 83        | 97             | 42         |
| 4         | 40             | < 0.1      | 44        | 40             | < 0.1      | 84        | 100            | 50         |
| 5         | 40             | < 0.1      | 45        | 40             | < 0.1      | 85        | 102            | 55         |
| 6         | 40             | < 0.1      | 46        | 40             | < 0.1      | 86        | 104            | 61         |
| 7         | 40             | < 0.1      | 47        | 40             | < 0.1      | 87        | 106            | 66         |
| 8         | 40             | < 0.1      | 48        | 40             | < 0.1      | 88        | 108            | 70         |
| 9         | 40             | < 0.1      | 49        | 40             | < 0.1      | 89        | 110            | 75         |
| 10        | 40             | < 0.1      | 50        | 40             | < 0.1      | 90        | 112            | 79         |
| 11        | 40             | < 0.1      | 51        | 40             | < 0.1      | 91        | 115            | 84         |
| 12        | 40             | < 0.1      | 52        | 40             | < 0.1      | 92        | 117            | 87         |
| 13        | 40             | < 0.1      | 53        | 40             | < 0.1      | 93        | 119            | 90         |
| 14        | 40             | < 0.1      | 54        | 40             | < 0.1      | 94        | 121            | 92         |
| 15        | 40             | < 0.1      | 55        | 40             | < 0.1      | 95        | 123            | 94         |
| 16        | 40             | < 0.1      | 56        | 40             | < 0.1      | 96        | 125            | 95         |
| 17        | 40             | < 0.1      | 57        | 41             | < 0.1      | 97        | 128            | 97         |

|    |    |       |    |    |       |     |     |    |
|----|----|-------|----|----|-------|-----|-----|----|
| 18 | 40 | < 0.1 | 58 | 43 | < 0.1 | 98  | 130 | 98 |
| 19 | 40 | < 0.1 | 59 | 45 | < 0.1 | 99  | 132 | 98 |
| 20 | 40 | < 0.1 | 60 | 48 | < 0.1 | 100 | 134 | 99 |
| 21 | 40 | < 0.1 | 61 | 50 | < 0.1 |     |     |    |
| 22 | 40 | < 0.1 | 62 | 52 | 0.1   |     |     |    |
| 23 | 40 | < 0.1 | 63 | 54 | 0.1   |     |     |    |
| 24 | 40 | < 0.1 | 64 | 56 | 0.1   |     |     |    |
| 25 | 40 | < 0.1 | 65 | 58 | 0.2   |     |     |    |
| 26 | 40 | < 0.1 | 66 | 61 | 0.5   |     |     |    |
| 27 | 40 | < 0.1 | 67 | 63 | 1     |     |     |    |
| 28 | 40 | < 0.1 | 68 | 65 | 1     |     |     |    |
| 29 | 40 | < 0.1 | 69 | 67 | 1     |     |     |    |
| 30 | 40 | < 0.1 | 70 | 69 | 2     |     |     |    |
| 31 | 40 | < 0.1 | 71 | 71 | 3     |     |     |    |
| 32 | 40 | < 0.1 | 72 | 74 | 4     |     |     |    |
| 33 | 40 | < 0.1 | 73 | 76 | 5     |     |     |    |
| 34 | 40 | < 0.1 | 74 | 78 | 7     |     |     |    |
| 35 | 40 | < 0.1 | 75 | 80 | 9     |     |     |    |
| 36 | 40 | < 0.1 | 76 | 82 | 12    |     |     |    |
| 37 | 40 | < 0.1 | 77 | 84 | 14    |     |     |    |
| 38 | 40 | < 0.1 | 78 | 87 | 19    |     |     |    |
| 39 | 40 | < 0.1 | 79 | 89 | 23    |     |     |    |

### NWR Standard Score Conversion Tables: 6;0-6;11

*n* = 30 (14 boys, 16 girls)

| Raw Score | Standard Score | Percentile | Raw Score | Standard Score | Percentile | Raw Score | Standard Score | Percentile |
|-----------|----------------|------------|-----------|----------------|------------|-----------|----------------|------------|
| 0         | 40             | < 0.1      | 40        | 40             | < 0.1      | 80        | 89             | 23         |
| 1         | 40             | < 0.1      | 41        | 40             | < 0.1      | 81        | 91             | 27         |
| 2         | 40             | < 0.1      | 42        | 40             | < 0.1      | 82        | 93             | 32         |
| 3         | 40             | < 0.1      | 43        | 40             | < 0.1      | 83        | 94             | 34         |
| 4         | 40             | < 0.1      | 44        | 40             | < 0.1      | 84        | 96             | 40         |

|    |    |       |    |    |       |     |     |    |
|----|----|-------|----|----|-------|-----|-----|----|
| 5  | 40 | < 0.1 | 45 | 40 | < 0.1 | 85  | 98  | 45 |
| 6  | 40 | < 0.1 | 46 | 40 | < 0.1 | 86  | 99  | 47 |
| 7  | 40 | < 0.1 | 47 | 40 | < 0.1 | 87  | 101 | 53 |
| 8  | 40 | < 0.1 | 48 | 40 | < 0.1 | 88  | 102 | 55 |
| 9  | 40 | < 0.1 | 49 | 40 | < 0.1 | 89  | 104 | 61 |
| 10 | 40 | < 0.1 | 50 | 40 | < 0.1 | 90  | 106 | 66 |
| 11 | 40 | < 0.1 | 51 | 41 | < 0.1 | 91  | 107 | 68 |
| 12 | 40 | < 0.1 | 52 | 43 | < 0.1 | 92  | 109 | 73 |
| 13 | 40 | < 0.1 | 53 | 44 | < 0.1 | 93  | 111 | 77 |
| 14 | 40 | < 0.1 | 54 | 46 | < 0.1 | 94  | 112 | 79 |
| 15 | 40 | < 0.1 | 55 | 48 | < 0.1 | 95  | 114 | 82 |
| 16 | 40 | < 0.1 | 56 | 49 | < 0.1 | 96  | 116 | 86 |
| 17 | 40 | < 0.1 | 57 | 51 | < 0.1 | 97  | 117 | 87 |
| 18 | 40 | < 0.1 | 58 | 53 | 0.1   | 98  | 119 | 90 |
| 19 | 40 | < 0.1 | 59 | 54 | 0.1   | 99  | 121 | 92 |
| 20 | 40 | < 0.1 | 60 | 56 | 0.1   | 100 | 122 | 93 |
| 21 | 40 | < 0.1 | 61 | 58 | 0.2   |     |     |    |
| 22 | 40 | < 0.1 | 62 | 59 | 0.3   |     |     |    |
| 23 | 40 | < 0.1 | 63 | 61 | 0.5   |     |     |    |
| 24 | 40 | < 0.1 | 64 | 63 | 1     |     |     |    |
| 25 | 40 | < 0.1 | 65 | 64 | 1     |     |     |    |
| 26 | 40 | < 0.1 | 66 | 66 | 1     |     |     |    |
| 27 | 40 | < 0.1 | 67 | 68 | 2     |     |     |    |
| 28 | 40 | < 0.1 | 68 | 69 | 2     |     |     |    |
| 29 | 40 | < 0.1 | 69 | 71 | 3     |     |     |    |
| 30 | 40 | < 0.1 | 70 | 73 | 4     |     |     |    |
| 31 | 40 | < 0.1 | 71 | 74 | 4     |     |     |    |
| 32 | 40 | < 0.1 | 72 | 76 | 5     |     |     |    |
| 33 | 40 | < 0.1 | 73 | 78 | 7     |     |     |    |
| 34 | 40 | < 0.1 | 74 | 79 | 8     |     |     |    |
| 35 | 40 | < 0.1 | 75 | 81 | 10    |     |     |    |
| 36 | 40 | < 0.1 | 76 | 83 | 13    |     |     |    |
| 37 | 40 | < 0.1 | 77 | 84 | 14    |     |     |    |
| 38 | 40 | < 0.1 | 78 | 86 | 18    |     |     |    |
| 39 | 40 | < 0.1 | 79 | 88 | 21    |     |     |    |

## NWR Standard Score Conversion Tables: 7;0–7;11

$n = 33$  (15 boys, 18 girls)

| Raw Score | Standard Score | Percentile | Raw Score | Standard Score | Percentile | Raw Score | Standard Score | Percentile |
|-----------|----------------|------------|-----------|----------------|------------|-----------|----------------|------------|
| 0         | 40             | < 0.1      | 40        | 40             | < 0.1      | 80        | 78             | 7          |
| 1         | 40             | < 0.1      | 41        | 40             | < 0.1      | 81        | 81             | 10         |
| 2         | 40             | < 0.1      | 42        | 40             | < 0.1      | 82        | 83             | 13         |
| 3         | 40             | < 0.1      | 43        | 40             | < 0.1      | 83        | 86             | 18         |
| 4         | 40             | < 0.1      | 44        | 40             | < 0.1      | 84        | 88             | 21         |
| 5         | 40             | < 0.1      | 45        | 40             | < 0.1      | 85        | 90             | 25         |
| 6         | 40             | < 0.1      | 46        | 40             | < 0.1      | 86        | 93             | 32         |
| 7         | 40             | < 0.1      | 47        | 40             | < 0.1      | 87        | 95             | 37         |
| 8         | 40             | < 0.1      | 48        | 40             | < 0.1      | 88        | 98             | 45         |
| 9         | 40             | < 0.1      | 49        | 40             | < 0.1      | 89        | 100            | 50         |
| 10        | 40             | < 0.1      | 50        | 40             | < 0.1      | 90        | 102            | 55         |
| 11        | 40             | < 0.1      | 51        | 40             | < 0.1      | 91        | 105            | 63         |
| 12        | 40             | < 0.1      | 52        | 40             | < 0.1      | 92        | 107            | 68         |
| 13        | 40             | < 0.1      | 53        | 40             | < 0.1      | 93        | 110            | 75         |
| 14        | 40             | < 0.1      | 54        | 40             | < 0.1      | 94        | 112            | 79         |
| 15        | 40             | < 0.1      | 55        | 40             | < 0.1      | 95        | 114            | 82         |
| 16        | 40             | < 0.1      | 56        | 40             | < 0.1      | 96        | 117            | 87         |
| 17        | 40             | < 0.1      | 57        | 40             | < 0.1      | 97        | 119            | 90         |
| 18        | 40             | < 0.1      | 58        | 40             | < 0.1      | 98        | 122            | 93         |
| 19        | 40             | < 0.1      | 59        | 40             | < 0.1      | 99        | 124            | 95         |
| 20        | 40             | < 0.1      | 60        | 40             | < 0.1      | 100       | 126            | 96         |
| 21        | 40             | < 0.1      | 61        | 40             | < 0.1      |           |                |            |
| 22        | 40             | < 0.1      | 62        | 40             | < 0.1      |           |                |            |
| 23        | 40             | < 0.1      | 63        | 40             | < 0.1      |           |                |            |
| 24        | 40             | < 0.1      | 64        | 40             | < 0.1      |           |                |            |
| 25        | 40             | < 0.1      | 65        | 42             | < 0.1      |           |                |            |
| 26        | 40             | < 0.1      | 66        | 45             | < 0.1      |           |                |            |
| 27        | 40             | < 0.1      | 67        | 47             | < 0.1      |           |                |            |
| 28        | 40             | < 0.1      | 68        | 50             | < 0.1      |           |                |            |

|    |    |       |    |    |     |
|----|----|-------|----|----|-----|
| 29 | 40 | < 0.1 | 69 | 52 | 0.1 |
| 30 | 40 | < 0.1 | 70 | 54 | 0.1 |
| 31 | 40 | < 0.1 | 71 | 57 | 0.1 |
| 32 | 40 | < 0.1 | 72 | 59 | 0.3 |
| 33 | 40 | < 0.1 | 73 | 62 | 1   |
| 34 | 40 | < 0.1 | 74 | 64 | 1   |
| 35 | 40 | < 0.1 | 75 | 66 | 1   |
| 36 | 40 | < 0.1 | 76 | 69 | 2   |
| 37 | 40 | < 0.1 | 77 | 71 | 3   |
| 38 | 40 | < 0.1 | 78 | 74 | 4   |
| 39 | 40 | < 0.1 | 79 | 76 | 5   |

### NWR Standard Score Conversion Tables: 8;0-8;11

*n* = 37 (22 boys, 15 girls)

| Raw Score | Standard Score | Percentile | Raw Score | Standard Score | Percentile | Raw Score | Standard Score | Percentile |
|-----------|----------------|------------|-----------|----------------|------------|-----------|----------------|------------|
| 0         | 40             | < 0.1      | 40        | 40             | < 0.1      | 80        | 71             | 3          |
| 1         | 40             | < 0.1      | 41        | 40             | < 0.1      | 81        | 74             | 4          |
| 2         | 40             | < 0.1      | 42        | 40             | < 0.1      | 82        | 77             | 6          |
| 3         | 40             | < 0.1      | 43        | 40             | < 0.1      | 83        | 79             | 8          |
| 4         | 40             | < 0.1      | 44        | 40             | < 0.1      | 84        | 82             | 12         |
| 5         | 40             | < 0.1      | 45        | 40             | < 0.1      | 85        | 85             | 16         |
| 6         | 40             | < 0.1      | 46        | 40             | < 0.1      | 86        | 88             | 21         |
| 7         | 40             | < 0.1      | 47        | 40             | < 0.1      | 87        | 90             | 25         |
| 8         | 40             | < 0.1      | 48        | 40             | < 0.1      | 88        | 93             | 32         |
| 9         | 40             | < 0.1      | 49        | 40             | < 0.1      | 89        | 96             | 40         |
| 10        | 40             | < 0.1      | 50        | 40             | < 0.1      | 90        | 98             | 45         |
| 11        | 40             | < 0.1      | 51        | 40             | < 0.1      | 91        | 101            | 53         |
| 12        | 40             | < 0.1      | 52        | 40             | < 0.1      | 92        | 104            | 61         |
| 13        | 40             | < 0.1      | 53        | 40             | < 0.1      | 93        | 107            | 68         |
| 14        | 40             | < 0.1      | 54        | 40             | < 0.1      | 94        | 109            | 73         |
| 15        | 40             | < 0.1      | 55        | 40             | < 0.1      | 95        | 112            | 79         |

|    |    |       |    |    |       |     |     |    |
|----|----|-------|----|----|-------|-----|-----|----|
| 16 | 40 | < 0.1 | 56 | 40 | < 0.1 | 96  | 115 | 84 |
| 17 | 40 | < 0.1 | 57 | 40 | < 0.1 | 97  | 117 | 87 |
| 18 | 40 | < 0.1 | 58 | 40 | < 0.1 | 98  | 120 | 91 |
| 19 | 40 | < 0.1 | 59 | 40 | < 0.1 | 99  | 123 | 94 |
| 20 | 40 | < 0.1 | 60 | 40 | < 0.1 | 100 | 125 | 95 |
| 21 | 40 | < 0.1 | 61 | 40 | < 0.1 |     |     |    |
| 22 | 40 | < 0.1 | 62 | 40 | < 0.1 |     |     |    |
| 23 | 40 | < 0.1 | 63 | 40 | < 0.1 |     |     |    |
| 24 | 40 | < 0.1 | 64 | 40 | < 0.1 |     |     |    |
| 25 | 40 | < 0.1 | 65 | 40 | < 0.1 |     |     |    |
| 26 | 40 | < 0.1 | 66 | 40 | < 0.1 |     |     |    |
| 27 | 40 | < 0.1 | 67 | 40 | < 0.1 |     |     |    |
| 28 | 40 | < 0.1 | 68 | 40 | < 0.1 |     |     |    |
| 29 | 40 | < 0.1 | 69 | 42 | < 0.1 |     |     |    |
| 30 | 40 | < 0.1 | 70 | 44 | < 0.1 |     |     |    |
| 31 | 40 | < 0.1 | 71 | 47 | < 0.1 |     |     |    |
| 32 | 40 | < 0.1 | 72 | 50 | < 0.1 |     |     |    |
| 33 | 40 | < 0.1 | 73 | 52 | 0.1   |     |     |    |
| 34 | 40 | < 0.1 | 74 | 55 | 0.1   |     |     |    |
| 35 | 40 | < 0.1 | 75 | 58 | 0.2   |     |     |    |
| 36 | 40 | < 0.1 | 76 | 61 | 0.5   |     |     |    |
| 37 | 40 | < 0.1 | 77 | 63 | 1     |     |     |    |
| 38 | 40 | < 0.1 | 78 | 66 | 1     |     |     |    |
| 39 | 40 | < 0.1 | 79 | 69 | 2     |     |     |    |

### NWR Standard Score Conversion Tables: 9;0–9;11

*n* = 12 (11 boys, 1 girl)

| Raw Score | Standard Score | Percentile | Raw Score | Standard Score | Percentile | Raw Score | Standard Score | Percentile |
|-----------|----------------|------------|-----------|----------------|------------|-----------|----------------|------------|
| 0         | 40             | < 0.1      | 40        | 40             | < 0.1      | 80        | 63             | 1          |
| 1         | 40             | < 0.1      | 41        | 40             | < 0.1      | 81        | 66             | 1          |
| 2         | 40             | < 0.1      | 42        | 40             | < 0.1      | 82        | 69             | 2          |

|    |    |       |    |    |       |     |     |    |
|----|----|-------|----|----|-------|-----|-----|----|
| 3  | 40 | < 0.1 | 43 | 40 | < 0.1 | 83  | 72  | 3  |
| 4  | 40 | < 0.1 | 44 | 40 | < 0.1 | 84  | 75  | 5  |
| 5  | 40 | < 0.1 | 45 | 40 | < 0.1 | 85  | 78  | 7  |
| 6  | 40 | < 0.1 | 46 | 40 | < 0.1 | 86  | 81  | 10 |
| 7  | 40 | < 0.1 | 47 | 40 | < 0.1 | 87  | 84  | 14 |
| 8  | 40 | < 0.1 | 48 | 40 | < 0.1 | 88  | 86  | 18 |
| 9  | 40 | < 0.1 | 49 | 40 | < 0.1 | 89  | 89  | 23 |
| 10 | 40 | < 0.1 | 50 | 40 | < 0.1 | 90  | 92  | 30 |
| 11 | 40 | < 0.1 | 51 | 40 | < 0.1 | 91  | 95  | 37 |
| 12 | 40 | < 0.1 | 52 | 40 | < 0.1 | 92  | 98  | 45 |
| 13 | 40 | < 0.1 | 53 | 40 | < 0.1 | 93  | 101 | 53 |
| 14 | 40 | < 0.1 | 54 | 40 | < 0.1 | 94  | 104 | 61 |
| 15 | 40 | < 0.1 | 55 | 40 | < 0.1 | 95  | 107 | 68 |
| 16 | 40 | < 0.1 | 56 | 40 | < 0.1 | 96  | 110 | 75 |
| 17 | 40 | < 0.1 | 57 | 40 | < 0.1 | 97  | 113 | 81 |
| 18 | 40 | < 0.1 | 58 | 40 | < 0.1 | 98  | 116 | 86 |
| 19 | 40 | < 0.1 | 59 | 40 | < 0.1 | 99  | 119 | 90 |
| 20 | 40 | < 0.1 | 60 | 40 | < 0.1 | 100 | 122 | 93 |
| 21 | 40 | < 0.1 | 61 | 40 | < 0.1 |     |     |    |
| 22 | 40 | < 0.1 | 62 | 40 | < 0.1 |     |     |    |
| 23 | 40 | < 0.1 | 63 | 40 | < 0.1 |     |     |    |
| 24 | 40 | < 0.1 | 64 | 40 | < 0.1 |     |     |    |
| 25 | 40 | < 0.1 | 65 | 40 | < 0.1 |     |     |    |
| 26 | 40 | < 0.1 | 66 | 40 | < 0.1 |     |     |    |
| 27 | 40 | < 0.1 | 67 | 40 | < 0.1 |     |     |    |
| 28 | 40 | < 0.1 | 68 | 40 | < 0.1 |     |     |    |
| 29 | 40 | < 0.1 | 69 | 40 | < 0.1 |     |     |    |
| 30 | 40 | < 0.1 | 70 | 40 | < 0.1 |     |     |    |
| 31 | 40 | < 0.1 | 71 | 40 | < 0.1 |     |     |    |
| 32 | 40 | < 0.1 | 72 | 40 | < 0.1 |     |     |    |
| 33 | 40 | < 0.1 | 73 | 42 | < 0.1 |     |     |    |
| 34 | 40 | < 0.1 | 74 | 45 | < 0.1 |     |     |    |
| 35 | 40 | < 0.1 | 75 | 48 | < 0.1 |     |     |    |
| 36 | 40 | < 0.1 | 76 | 51 | < 0.1 |     |     |    |
| 37 | 40 | < 0.1 | 77 | 54 | 0.1   |     |     |    |



|    |    |       |  |    |    |     |  |
|----|----|-------|--|----|----|-----|--|
| 38 | 40 | < 0.1 |  | 78 | 57 | 0.1 |  |
| 39 | 40 | < 0.1 |  | 79 | 60 | 0.4 |  |

## Reference

Dollaghan, C., & Campbell, T. F. (1998). Nonword repetition and child language impairment. *Journal of Speech, Language, and Hearing Research*, 41, 1136–2246.
