# Supplementary material
Source: publisher figshare collection journal article supplement (https://asha.figshare.com/articles/dataset/_/8285786)
Supplement: Supplementary file 2 [file 1]

## Past-Tense Marking Standard Score Conversion Tables: 5;0–5;5

**Ages 5;0–5;5 (*N* = 65; boys = 33, girls = 32)**

Confidence Intervals:

68% ± 1.86

90% ± 3.06

95% ± 3.65

| Past-Tense Raw Score | Standard Score | Percentile | Past-Tense Raw Score | Standard Score | Percentile | Past-Tense Raw Score | Standard Score | Percentile |
|----------------------|----------------|------------|----------------------|----------------|------------|----------------------|----------------|------------|
| 0                    | 40             | < 0.1      | 33                   | 45             | < 0.1      | 66                   | 76             | 5          |
| 1                    | 40             | < 0.1      | 34                   | 46             | < 0.1      | 67                   | 77             | 6          |
| 2                    | 40             | < 0.1      | 35                   | 47             | < 0.1      | 68                   | 78             | 7          |
| 3                    | 40             | < 0.1      | 36                   | 48             | < 0.1      | 69                   | 79             | 8          |
| 4                    | 40             | < 0.1      | 37                   | 49             | < 0.1      | 70                   | 80             | 9          |
| 5                    | 40             | < 0.1      | 38                   | 50             | < 0.1      | 71                   | 81             | 10         |
| 6                    | 40             | < 0.1      | 39                   | 51             | 0.1        | 72                   | 82             | 12         |
| 7                    | 40             | < 0.1      | 40                   | 52             | 0.1        | 73                   | 83             | 13         |
| 8                    | 40             | < 0.1      | 41                   | 53             | 0.1        | 74                   | 84             | 14         |
| 9                    | 40             | < 0.1      | 42                   | 54             | 0.1        | 75                   | 85             | 16         |
| 10                   | 40             | < 0.1      | 43                   | 55             | 0.1        | 76                   | 86             | 18         |
| 11                   | 40             | < 0.1      | 44                   | 56             | 0.2        | 77                   | 87             | 19         |
| 12                   | 40             | < 0.1      | 45                   | 56             | 0.2        | 78                   | 88             | 21         |
| 13                   | 40             | < 0.1      | 46                   | 57             | 0.2        | 79                   | 89             | 23         |
| 14                   | 40             | < 0.1      | 47                   | 58             | 0.3        | 80                   | 90             | 25         |
| 15                   | 40             | < 0.1      | 48                   | 59             | 0.3        | 81                   | 90             | 25         |
| 16                   | 40             | < 0.1      | 49                   | 60             | 0.4        | 82                   | 91             | 27         |
| 17                   | 40             | < 0.1      | 50                   | 61             | 0.5        | 83                   | 92             | 30         |
| 18                   | 40             | < 0.1      | 51                   | 62             | 1          | 84                   | 93             | 32         |
| 19                   | 40             | < 0.1      | 52                   | 63             | 1          | 85                   | 94             | 34         |
| 20                   | 40             | < 0.1      | 53                   | 64             | 1          | 86                   | 95             | 37         |
| 21                   | 40             | < 0.1      | 54                   | 65             | 1          | 87                   | 96             | 39         |
| 22                   | 40             | < 0.1      | 55                   | 66             | 1          | 88                   | 97             | 42         |
| 23                   | 40             | < 0.1      | 56                   | 67             | 1          | 89                   | 98             | 45         |
| 24                   | 40             | < 0.1      | 57                   | 68             | 2          | 90                   | 99             | 47         |
| 25                   | 40             | < 0.1      | 58                   | 69             | 2          | 91                   | 100            | 50         |
| 26                   | 40             | < 0.1      | 59                   | 70             | 2          | 92                   | 101            | 53         |
| 27                   | 40             | < 0.1      | 60                   | 71             | 3          | 93                   | 102            | 55         |

|    |    |       |    |    |   |     |     |    |
|----|----|-------|----|----|---|-----|-----|----|
| 28 | 40 | < 0.1 | 61 | 72 | 3 | 94  | 103 | 58 |
| 29 | 41 | < 0.1 | 62 | 73 | 4 | 95  | 104 | 61 |
| 30 | 42 | < 0.1 | 63 | 73 | 4 | 96  | 105 | 63 |
| 31 | 43 | < 0.1 | 64 | 74 | 4 | 97  | 106 | 66 |
| 32 | 44 | < 0.1 | 65 | 75 | 5 | 98  | 107 | 68 |
|    |    |       |    |    |   | 99  | 107 | 68 |
|    |    |       |    |    |   | 100 | 108 | 70 |

## Past-Tense Marking Standard Score Conversion Tables: 5;6–5;11

| <b>Ages 5;6–5;11 (<i>N</i> = 92; boys = 47, girls = 45)</b><br>Confidence Intervals:<br>68% ± 1.56<br>90% ± 2.57<br>95% ± 3.06 |                |            |                      |                |            |                      |                |            |
|--------------------------------------------------------------------------------------------------------------------------------|----------------|------------|----------------------|----------------|------------|----------------------|----------------|------------|
| Past-Tense Raw Score                                                                                                           | Standard Score | Percentile | Past-Tense Raw Score | Standard Score | Percentile | Past-Tense Raw Score | Standard Score | Percentile |
| 0                                                                                                                              | 40             | < 0.1      | 33                   | 45             | < 0.1      | 66                   | 76             | 5          |
| 1                                                                                                                              | 40             | < 0.1      | 34                   | 46             | < 0.1      | 67                   | 77             | 6          |
| 2                                                                                                                              | 40             | < 0.1      | 35                   | 47             | < 0.1      | 68                   | 78             | 7          |
| 3                                                                                                                              | 40             | < 0.1      | 36                   | 48             | < 0.1      | 69                   | 79             | 8          |
| 4                                                                                                                              | 40             | < 0.1      | 37                   | 49             | < 0.1      | 70                   | 80             | 9          |
| 5                                                                                                                              | 40             | < 0.1      | 38                   | 50             | < 0.1      | 71                   | 81             | 10         |
| 6                                                                                                                              | 40             | < 0.1      | 39                   | 51             | 0.1        | 72                   | 82             | 12         |
| 7                                                                                                                              | 40             | < 0.1      | 40                   | 52             | 0.1        | 73                   | 83             | 13         |
| 8                                                                                                                              | 40             | < 0.1      | 41                   | 53             | 0.1        | 74                   | 84             | 14         |
| 9                                                                                                                              | 40             | < 0.1      | 42                   | 53             | 0.1        | 75                   | 85             | 16         |
| 10                                                                                                                             | 40             | < 0.1      | 43                   | 54             | 0.1        | 76                   | 86             | 18         |
| 11                                                                                                                             | 40             | < 0.1      | 44                   | 55             | 0.1        | 77                   | 87             | 19         |
| 12                                                                                                                             | 40             | < 0.1      | 45                   | 56             | 0.2        | 78                   | 88             | 21         |
| 13                                                                                                                             | 40             | < 0.1      | 46                   | 57             | 0.2        | 79                   | 89             | 23         |
| 14                                                                                                                             | 40             | < 0.1      | 47                   | 58             | 0.3        | 80                   | 90             | 25         |
| 15                                                                                                                             | 40             | < 0.1      | 48                   | 59             | 0.3        | 81                   | 91             | 27         |
| 16                                                                                                                             | 40             | < 0.1      | 49                   | 60             | 0.4        | 82                   | 92             | 30         |
| 17                                                                                                                             | 40             | < 0.1      | 50                   | 61             | 0.5        | 83                   | 93             | 32         |
| 18                                                                                                                             | 40             | < 0.1      | 51                   | 62             | 1          | 84                   | 94             | 34         |

|    |    |       |    |    |   |     |     |    |
|----|----|-------|----|----|---|-----|-----|----|
| 19 | 40 | < 0.1 | 52 | 63 | 1 | 85  | 95  | 37 |
| 20 | 40 | < 0.1 | 53 | 64 | 1 | 86  | 96  | 39 |
| 21 | 40 | < 0.1 | 54 | 65 | 1 | 87  | 97  | 42 |
| 22 | 40 | < 0.1 | 55 | 66 | 1 | 88  | 97  | 42 |
| 23 | 40 | < 0.1 | 56 | 67 | 1 | 89  | 98  | 45 |
| 24 | 40 | < 0.1 | 57 | 68 | 2 | 90  | 99  | 47 |
| 25 | 40 | < 0.1 | 58 | 69 | 2 | 91  | 100 | 50 |
| 26 | 40 | < 0.1 | 59 | 70 | 2 | 92  | 101 | 53 |
| 27 | 40 | < 0.1 | 60 | 71 | 3 | 93  | 102 | 55 |
| 28 | 40 | < 0.1 | 61 | 72 | 3 | 94  | 103 | 58 |
| 29 | 41 | < 0.1 | 62 | 73 | 4 | 95  | 104 | 61 |
| 30 | 42 | < 0.1 | 63 | 74 | 4 | 96  | 105 | 63 |
| 31 | 43 | < 0.1 | 64 | 75 | 5 | 97  | 106 | 66 |
| 32 | 44 | < 0.1 | 65 | 75 | 5 | 98  | 107 | 68 |
|    |    |       |    |    |   | 99  | 108 | 70 |
|    |    |       |    |    |   | 100 | 109 | 73 |

## Past-Tense Marking Standard Score Conversion Tables: 6;0–6;5

| <b>Ages 6;0–6;5 (N = 106; boys = 46, girls = 60)</b><br>Confidence Intervals:<br>68% ± 1.46<br>90% ± 2.40<br>95% ± 2.86 |                |            |                      |                |            |                      |                |            |
|-------------------------------------------------------------------------------------------------------------------------|----------------|------------|----------------------|----------------|------------|----------------------|----------------|------------|
| Past-Tense Raw Score                                                                                                    | Standard Score | Percentile | Past-Tense Raw Score | Standard Score | Percentile | Past-Tense Raw Score | Standard Score | Percentile |
| 0                                                                                                                       | 40             | < 0.1      | 33                   | 40             | < 0.1      | 66                   | 71             | 3          |
| 1                                                                                                                       | 40             | < 0.1      | 34                   | 40             | < 0.1      | 67                   | 73             | 4          |
| 2                                                                                                                       | 40             | < 0.1      | 35                   | 40             | < 0.1      | 68                   | 74             | 4          |
| 3                                                                                                                       | 40             | < 0.1      | 36                   | 40             | < 0.1      | 69                   | 75             | 5          |
| 4                                                                                                                       | 40             | < 0.1      | 37                   | 40             | < 0.1      | 70                   | 76             | 5          |
| 5                                                                                                                       | 40             | < 0.1      | 38                   | 41             | < 0.1      | 71                   | 77             | 6          |
| 6                                                                                                                       | 40             | < 0.1      | 39                   | 42             | < 0.1      | 72                   | 78             | 7          |
| 7                                                                                                                       | 40             | < 0.1      | 40                   | 43             | < 0.1      | 73                   | 79             | 8          |
| 8                                                                                                                       | 40             | < 0.1      | 41                   | 44             | < 0.1      | 74                   | 80             | 9          |
| 9                                                                                                                       | 40             | < 0.1      | 42                   | 45             | < 0.1      | 75                   | 81             | 10         |

|    |    |       |    |    |       |     |     |    |
|----|----|-------|----|----|-------|-----|-----|----|
| 10 | 40 | < 0.1 | 43 | 46 | < 0.1 | 76  | 82  | 12 |
| 11 | 40 | < 0.1 | 44 | 47 | < 0.1 | 77  | 83  | 13 |
| 12 | 40 | < 0.1 | 45 | 49 | < 0.1 | 78  | 85  | 16 |
| 13 | 40 | < 0.1 | 46 | 50 | < 0.1 | 79  | 86  | 18 |
| 14 | 40 | < 0.1 | 47 | 51 | 0.1   | 80  | 87  | 19 |
| 15 | 40 | < 0.1 | 48 | 52 | 0.1   | 81  | 88  | 21 |
| 16 | 40 | < 0.1 | 49 | 53 | 0.1   | 82  | 89  | 23 |
| 17 | 40 | < 0.1 | 50 | 54 | 0.1   | 83  | 90  | 25 |
| 18 | 40 | < 0.1 | 51 | 55 | 0.1   | 84  | 91  | 27 |
| 19 | 40 | < 0.1 | 52 | 56 | 0.2   | 85  | 92  | 30 |
| 20 | 40 | < 0.1 | 53 | 57 | 0.2   | 86  | 93  | 32 |
| 21 | 40 | < 0.1 | 54 | 58 | 0.3   | 87  | 94  | 34 |
| 22 | 40 | < 0.1 | 55 | 59 | 0.3   | 88  | 95  | 37 |
| 23 | 40 | < 0.1 | 56 | 61 | 0.5   | 89  | 96  | 39 |
| 24 | 40 | < 0.1 | 57 | 62 | 1     | 90  | 98  | 45 |
| 25 | 40 | < 0.1 | 58 | 63 | 1     | 91  | 99  | 47 |
| 26 | 40 | < 0.1 | 59 | 64 | 1     | 92  | 100 | 50 |
| 27 | 40 | < 0.1 | 60 | 65 | 1     | 93  | 101 | 53 |
| 28 | 40 | < 0.1 | 61 | 66 | 1     | 94  | 102 | 55 |
| 29 | 40 | < 0.1 | 62 | 67 | 1     | 95  | 103 | 58 |
| 30 | 40 | < 0.1 | 63 | 68 | 2     | 96  | 104 | 61 |
| 31 | 40 | < 0.1 | 64 | 69 | 2     | 97  | 105 | 63 |
| 32 | 40 | < 0.1 | 65 | 70 | 2     | 98  | 106 | 66 |
|    |    |       |    |    |       | 99  | 107 | 68 |
|    |    |       |    |    |       | 100 | 108 | 70 |

## Past-Tense Marking Standard Score Conversion Tables: 6;6–6;11

| <b>Ages 6;6–6;11 (N = 141; boys = 80, girls = 61)</b><br>Confidence Intervals:<br>68% ± 1.26<br>90% ± 2.07<br>95% ± 2.47 |                |            |                      |                |            |                      |                |            |
|--------------------------------------------------------------------------------------------------------------------------|----------------|------------|----------------------|----------------|------------|----------------------|----------------|------------|
| Past-Tense Raw Score                                                                                                     | Standard Score | Percentile | Past-Tense Raw Score | Standard Score | Percentile | Past-Tense Raw Score | Standard Score | Percentile |
| 0                                                                                                                        | 40             | < 0.1      | 33                   | 40             | < 0.1      | 66                   | 43             | < 0.1      |

|     |     |       |
|-----|-----|-------|
| 1   | 40  | < 0.1 |
| 2   | 40  | < 0.1 |
| 3   | 40  | < 0.1 |
| 4   | 40  | < 0.1 |
| 5   | 40  | < 0.1 |
| 6   | 40  | < 0.1 |
| 7   | 40  | < 0.1 |
| 8   | 40  | < 0.1 |
| 9   | 40  | < 0.1 |
| 10  | 40  | < 0.1 |
| 11  | 40  | < 0.1 |
| 12  | 40  | < 0.1 |
| 13  | 40  | < 0.1 |
| 14  | 40  | < 0.1 |
| 15  | 40  | < 0.1 |
| 16  | 40  | < 0.1 |
| 17  | 40  | < 0.1 |
| 18  | 40  | < 0.1 |
| 19  | 40  | < 0.1 |
| 20  | 40  | < 0.1 |
| 21  | 40  | < 0.1 |
| 22  | 40  | < 0.1 |
| 23  | 40  | < 0.1 |
| 24  | 40  | < 0.1 |
| 25  | 40  | < 0.1 |
| 26  | 40  | < 0.1 |
| 27  | 40  | < 0.1 |
| 28  | 40  | < 0.1 |
| 29  | 40  | < 0.1 |
| 30  | 40  | < 0.1 |
| 31  | 40  | < 0.1 |
| 32  | 40  | < 0.1 |
| 34  | 40  | < 0.1 |
| 35  | 40  | < 0.1 |
| 36  | 40  | < 0.1 |
| 37  | 40  | < 0.1 |
| 38  | 40  | < 0.1 |
| 39  | 40  | < 0.1 |
| 40  | 40  | < 0.1 |
| 41  | 40  | < 0.1 |
| 42  | 40  | < 0.1 |
| 43  | 40  | < 0.1 |
| 44  | 40  | < 0.1 |
| 45  | 40  | < 0.1 |
| 46  | 40  | < 0.1 |
| 47  | 40  | < 0.1 |
| 48  | 40  | < 0.1 |
| 49  | 40  | < 0.1 |
| 50  | 40  | < 0.1 |
| 51  | 40  | < 0.1 |
| 52  | 40  | < 0.1 |
| 53  | 40  | < 0.1 |
| 54  | 40  | < 0.1 |
| 55  | 40  | < 0.1 |
| 56  | 40  | < 0.1 |
| 57  | 40  | < 0.1 |
| 58  | 40  | < 0.1 |
| 59  | 40  | < 0.1 |
| 60  | 40  | < 0.1 |
| 61  | 40  | < 0.1 |
| 62  | 40  | < 0.1 |
| 63  | 40  | < 0.1 |
| 64  | 40  | < 0.1 |
| 65  | 41  | < 0.1 |
| 67  | 45  | < 0.1 |
| 68  | 47  | < 0.1 |
| 69  | 49  | < 0.1 |
| 70  | 51  | 0.1   |
| 71  | 53  | 0.1   |
| 72  | 55  | 0.1   |
| 73  | 57  | 0.2   |
| 74  | 59  | 0.3   |
| 75  | 61  | 0.5   |
| 76  | 63  | 1     |
| 77  | 65  | 1     |
| 78  | 66  | 1     |
| 79  | 68  | 2     |
| 80  | 70  | 2     |
| 81  | 72  | 3     |
| 82  | 74  | 4     |
| 83  | 76  | 5     |
| 84  | 78  | 7     |
| 85  | 80  | 9     |
| 86  | 82  | 12    |
| 87  | 84  | 14    |
| 88  | 86  | 18    |
| 89  | 88  | 21    |
| 90  | 90  | 25    |
| 91  | 92  | 30    |
| 92  | 94  | 34    |
| 93  | 96  | 39    |
| 94  | 98  | 45    |
| 95  | 100 | 50    |
| 96  | 102 | 55    |
| 97  | 104 | 61    |
| 98  | 106 | 66    |
| 99  | 108 | 70    |
| 100 | 110 | 75    |

## Past-Tense Marking Standard Score Conversion Tables: 7;0–7;5

**Ages 7;0–7;5 ( $N = 114$ ; boys = 55, girls = 59)**

Confidence Intervals:

68%  $\pm 1.40$

90%  $\pm 2.30$

95%  $\pm 2.74$

| Past-Tense Raw Score | Standard Score | Percentile | Past-Tense Raw Score | Standard Score | Percentile | Past-Tense Raw Score | Standard Score | Percentile |
|----------------------|----------------|------------|----------------------|----------------|------------|----------------------|----------------|------------|
| 0                    | 40             | < 0.1      | 33                   | 40             | < 0.1      | 66                   | 59             | 0.3        |
| 1                    | 40             | < 0.1      | 34                   | 40             | < 0.1      | 67                   | 61             | 0.5        |
| 2                    | 40             | < 0.1      | 35                   | 40             | < 0.1      | 68                   | 62             | 1          |
| 3                    | 40             | < 0.1      | 36                   | 40             | < 0.1      | 69                   | 64             | 1          |
| 4                    | 40             | < 0.1      | 37                   | 40             | < 0.1      | 70                   | 65             | 1          |
| 5                    | 40             | < 0.1      | 38                   | 40             | < 0.1      | 71                   | 66             | 1          |
| 6                    | 40             | < 0.1      | 39                   | 40             | < 0.1      | 72                   | 68             | 2          |
| 7                    | 40             | < 0.1      | 40                   | 40             | < 0.1      | 73                   | 69             | 2          |
| 8                    | 40             | < 0.1      | 41                   | 40             | < 0.1      | 74                   | 71             | 3          |
| 9                    | 40             | < 0.1      | 42                   | 40             | < 0.1      | 75                   | 72             | 3          |
| 10                   | 40             | < 0.1      | 43                   | 40             | < 0.1      | 76                   | 74             | 4          |
| 11                   | 40             | < 0.1      | 44                   | 40             | < 0.1      | 77                   | 75             | 5          |
| 12                   | 40             | < 0.1      | 45                   | 40             | < 0.1      | 78                   | 76             | 5          |
| 13                   | 40             | < 0.1      | 46                   | 40             | < 0.1      | 79                   | 78             | 7          |
| 14                   | 40             | < 0.1      | 47                   | 40             | < 0.1      | 80                   | 79             | 8          |
| 15                   | 40             | < 0.1      | 48                   | 40             | < 0.1      | 81                   | 81             | 10         |
| 16                   | 40             | < 0.1      | 49                   | 40             | < 0.1      | 82                   | 82             | 12         |
| 17                   | 40             | < 0.1      | 50                   | 40             | < 0.1      | 83                   | 83             | 13         |
| 18                   | 40             | < 0.1      | 51                   | 40             | < 0.1      | 84                   | 85             | 16         |
| 19                   | 40             | < 0.1      | 52                   | 40             | < 0.1      | 85                   | 86             | 18         |
| 20                   | 40             | < 0.1      | 53                   | 41             | < 0.1      | 86                   | 88             | 21         |
| 21                   | 40             | < 0.1      | 54                   | 43             | < 0.1      | 87                   | 89             | 23         |
| 22                   | 40             | < 0.1      | 55                   | 44             | < 0.1      | 88                   | 90             | 25         |
| 23                   | 40             | < 0.1      | 56                   | 45             | < 0.1      | 89                   | 92             | 30         |
| 24                   | 40             | < 0.1      | 57                   | 47             | < 0.1      | 90                   | 93             | 32         |
| 25                   | 40             | < 0.1      | 58                   | 48             | < 0.1      | 91                   | 95             | 37         |
| 26                   | 40             | < 0.1      | 59                   | 50             | < 0.1      | 92                   | 96             | 39         |
| 27                   | 40             | < 0.1      | 60                   | 51             | 0.1        | 93                   | 97             | 42         |

|    |    |       |    |    |     |     |     |    |
|----|----|-------|----|----|-----|-----|-----|----|
| 28 | 40 | < 0.1 | 61 | 52 | 0.1 | 94  | 99  | 47 |
| 29 | 40 | < 0.1 | 62 | 54 | 0.1 | 95  | 100 | 50 |
| 30 | 40 | < 0.1 | 63 | 55 | 0.1 | 96  | 102 | 55 |
| 31 | 40 | < 0.1 | 64 | 57 | 0.2 | 97  | 103 | 58 |
| 32 | 40 | < 0.1 | 65 | 58 | 0.3 | 98  | 104 | 61 |
|    |    |       |    |    |     | 99  | 106 | 66 |
|    |    |       |    |    |     | 100 | 107 | 68 |

## Past-Tense Marking Standard Score Conversion Tables: 7;6–7;11

| <b>Ages 7;6–7;11 (<i>N</i> = 81; boys = 46, girls = 35)</b><br>Confidence Intervals:<br>68% ± 1.67<br>90% ± 2.74<br>95% ± 3.27 |                |            |                      |                |            |                      |                |            |
|--------------------------------------------------------------------------------------------------------------------------------|----------------|------------|----------------------|----------------|------------|----------------------|----------------|------------|
| Past-Tense Raw Score                                                                                                           | Standard Score | Percentile | Past-Tense Raw Score | Standard Score | Percentile | Past-Tense Raw Score | Standard Score | Percentile |
| 0                                                                                                                              | 40             | < 0.1      | 33                   | 40             | < 0.1      | 66                   | 43             | < 0.1      |
| 1                                                                                                                              | 40             | < 0.1      | 34                   | 40             | < 0.1      | 67                   | 45             | < 0.1      |
| 2                                                                                                                              | 40             | < 0.1      | 35                   | 40             | < 0.1      | 68                   | 47             | < 0.1      |
| 3                                                                                                                              | 40             | < 0.1      | 36                   | 40             | < 0.1      | 69                   | 49             | < 0.1      |
| 4                                                                                                                              | 40             | < 0.1      | 37                   | 40             | < 0.1      | 70                   | 51             | 0.1        |
| 5                                                                                                                              | 40             | < 0.1      | 38                   | 40             | < 0.1      | 71                   | 53             | 0.1        |
| 6                                                                                                                              | 40             | < 0.1      | 39                   | 40             | < 0.1      | 72                   | 54             | 0.1        |
| 7                                                                                                                              | 40             | < 0.1      | 40                   | 40             | < 0.1      | 73                   | 56             | 0.2        |
| 8                                                                                                                              | 40             | < 0.1      | 41                   | 40             | < 0.1      | 74                   | 58             | 0.3        |
| 9                                                                                                                              | 40             | < 0.1      | 42                   | 40             | < 0.1      | 75                   | 60             | 0.4        |
| 10                                                                                                                             | 40             | < 0.1      | 43                   | 40             | < 0.1      | 76                   | 62             | 1          |
| 11                                                                                                                             | 40             | < 0.1      | 44                   | 40             | < 0.1      | 77                   | 64             | 1          |
| 12                                                                                                                             | 40             | < 0.1      | 45                   | 40             | < 0.1      | 78                   | 66             | 1          |
| 13                                                                                                                             | 40             | < 0.1      | 46                   | 40             | < 0.1      | 79                   | 68             | 2          |
| 14                                                                                                                             | 40             | < 0.1      | 47                   | 40             | < 0.1      | 80                   | 70             | 2          |
| 15                                                                                                                             | 40             | < 0.1      | 48                   | 40             | < 0.1      | 81                   | 72             | 3          |
| 16                                                                                                                             | 40             | < 0.1      | 49                   | 40             | < 0.1      | 82                   | 74             | 4          |
| 17                                                                                                                             | 40             | < 0.1      | 50                   | 40             | < 0.1      | 83                   | 76             | 5          |
| 18                                                                                                                             | 40             | < 0.1      | 51                   | 40             | < 0.1      | 84                   | 78             | 7          |

|    |    |       |    |    |       |     |     |    |
|----|----|-------|----|----|-------|-----|-----|----|
| 19 | 40 | < 0.1 | 52 | 40 | < 0.1 | 85  | 80  | 9  |
| 20 | 40 | < 0.1 | 53 | 40 | < 0.1 | 86  | 82  | 12 |
| 21 | 40 | < 0.1 | 54 | 40 | < 0.1 | 87  | 83  | 13 |
| 22 | 40 | < 0.1 | 55 | 40 | < 0.1 | 88  | 85  | 16 |
| 23 | 40 | < 0.1 | 56 | 40 | < 0.1 | 89  | 87  | 19 |
| 24 | 40 | < 0.1 | 57 | 40 | < 0.1 | 90  | 89  | 23 |
| 25 | 40 | < 0.1 | 58 | 40 | < 0.1 | 91  | 91  | 27 |
| 26 | 40 | < 0.1 | 59 | 40 | < 0.1 | 92  | 93  | 32 |
| 27 | 40 | < 0.1 | 60 | 40 | < 0.1 | 93  | 95  | 37 |
| 28 | 40 | < 0.1 | 61 | 40 | < 0.1 | 94  | 97  | 42 |
| 29 | 40 | < 0.1 | 62 | 40 | < 0.1 | 95  | 99  | 47 |
| 30 | 40 | < 0.1 | 63 | 40 | < 0.1 | 96  | 101 | 53 |
| 31 | 40 | < 0.1 | 64 | 40 | < 0.1 | 97  | 103 | 58 |
| 32 | 40 | < 0.1 | 65 | 41 | < 0.1 | 98  | 105 | 63 |
|    |    |       |    |    |       | 99  | 107 | 68 |
|    |    |       |    |    |       | 100 | 109 | 73 |

## Past-Tense Marking Standard Score Conversion Tables: 8;0–8;5

| <b>Ages 8;0–8;5 (<i>N</i> = 84; boys = 40, girls = 44)</b><br>Confidence Intervals:<br>68% ± 1.64<br>90% ± 2.69<br>95% ± 3.21 |                |            |                      |                |            |                      |                |            |
|-------------------------------------------------------------------------------------------------------------------------------|----------------|------------|----------------------|----------------|------------|----------------------|----------------|------------|
| Past-Tense Raw Score                                                                                                          | Standard Score | Percentile | Past-Tense Raw Score | Standard Score | Percentile | Past-Tense Raw Score | Standard Score | Percentile |
| 0                                                                                                                             | 40             | < 0.1      | 33                   | 40             | < 0.1      | 66                   | 40             | < 0.1      |
| 1                                                                                                                             | 40             | < 0.1      | 34                   | 40             | < 0.1      | 67                   | 40             | < 0.1      |
| 2                                                                                                                             | 40             | < 0.1      | 35                   | 40             | < 0.1      | 68                   | 40             | < 0.1      |
| 3                                                                                                                             | 40             | < 0.1      | 36                   | 40             | < 0.1      | 69                   | 40             | < 0.1      |
| 4                                                                                                                             | 40             | < 0.1      | 37                   | 40             | < 0.1      | 70                   | 40             | < 0.1      |
| 5                                                                                                                             | 40             | < 0.1      | 38                   | 40             | < 0.1      | 71                   | 40             | < 0.1      |
| 6                                                                                                                             | 40             | < 0.1      | 39                   | 40             | < 0.1      | 72                   | 40             | < 0.1      |
| 7                                                                                                                             | 40             | < 0.1      | 40                   | 40             | < 0.1      | 73                   | 40             | < 0.1      |
| 8                                                                                                                             | 40             | < 0.1      | 41                   | 40             | < 0.1      | 74                   | 40             | < 0.1      |
| 9                                                                                                                             | 40             | < 0.1      | 42                   | 40             | < 0.1      | 75                   | 41             | < 0.1      |



|    |    |       |    |    |       |     |     |       |
|----|----|-------|----|----|-------|-----|-----|-------|
| 10 | 40 | < 0.1 | 43 | 40 | < 0.1 | 76  | 44  | < 0.1 |
| 11 | 40 | < 0.1 | 44 | 40 | < 0.1 | 77  | 46  | < 0.1 |
| 12 | 40 | < 0.1 | 45 | 40 | < 0.1 | 78  | 49  | < 0.1 |
| 13 | 40 | < 0.1 | 46 | 40 | < 0.1 | 79  | 51  | 0.1   |
| 14 | 40 | < 0.1 | 47 | 40 | < 0.1 | 80  | 54  | 0.1   |
| 15 | 40 | < 0.1 | 48 | 40 | < 0.1 | 81  | 57  | 0.2   |
| 16 | 40 | < 0.1 | 49 | 40 | < 0.1 | 82  | 59  | 0.3   |
| 17 | 40 | < 0.1 | 50 | 40 | < 0.1 | 83  | 62  | 1     |
| 18 | 40 | < 0.1 | 51 | 40 | < 0.1 | 84  | 64  | 1     |
| 19 | 40 | < 0.1 | 52 | 40 | < 0.1 | 85  | 67  | 1     |
| 20 | 40 | < 0.1 | 53 | 40 | < 0.1 | 86  | 70  | 2     |
| 21 | 40 | < 0.1 | 54 | 40 | < 0.1 | 87  | 72  | 3     |
| 22 | 40 | < 0.1 | 55 | 40 | < 0.1 | 88  | 75  | 5     |
| 23 | 40 | < 0.1 | 56 | 40 | < 0.1 | 89  | 78  | 7     |
| 24 | 40 | < 0.1 | 57 | 40 | < 0.1 | 90  | 80  | 9     |
| 25 | 40 | < 0.1 | 58 | 40 | < 0.1 | 91  | 83  | 13    |
| 26 | 40 | < 0.1 | 59 | 40 | < 0.1 | 92  | 85  | 16    |
| 27 | 40 | < 0.1 | 60 | 40 | < 0.1 | 93  | 88  | 21    |
| 28 | 40 | < 0.1 | 61 | 40 | < 0.1 | 94  | 91  | 27    |
| 29 | 40 | < 0.1 | 62 | 40 | < 0.1 | 95  | 93  | 32    |
| 30 | 40 | < 0.1 | 63 | 40 | < 0.1 | 96  | 96  | 39    |
| 31 | 40 | < 0.1 | 64 | 40 | < 0.1 | 97  | 98  | 45    |
| 32 | 40 | < 0.1 | 65 | 40 | < 0.1 | 98  | 101 | 53    |
|    |    |       |    |    |       | 99  | 104 | 61    |
|    |    |       |    |    |       | 100 | 106 | 66    |

## Past-Tense Marking Standard Score Conversion Tables: 8;6–8;11

| <b>Ages 8;6–8;11 (<i>N</i> = 73; boys = 45, girls = 28)</b><br>Confidence Intervals:<br>68% ± 1.76<br>90% ± 2.90<br>95% ± 3.45 |                |            |                      |                |            |                      |                |            |
|--------------------------------------------------------------------------------------------------------------------------------|----------------|------------|----------------------|----------------|------------|----------------------|----------------|------------|
| Past-Tense Raw Score                                                                                                           | Standard Score | Percentile | Past-Tense Raw Score | Standard Score | Percentile | Past-Tense Raw Score | Standard Score | Percentile |
| 0                                                                                                                              | 40             | < 0.1      | 33                   | 40             | < 0.1      | 66                   | 40             | < 0.1      |

|     |     |       |
|-----|-----|-------|
| 1   | 40  | < 0.1 |
| 2   | 40  | < 0.1 |
| 3   | 40  | < 0.1 |
| 4   | 40  | < 0.1 |
| 5   | 40  | < 0.1 |
| 6   | 40  | < 0.1 |
| 7   | 40  | < 0.1 |
| 8   | 40  | < 0.1 |
| 9   | 40  | < 0.1 |
| 10  | 40  | < 0.1 |
| 11  | 40  | < 0.1 |
| 12  | 40  | < 0.1 |
| 13  | 40  | < 0.1 |
| 14  | 40  | < 0.1 |
| 15  | 40  | < 0.1 |
| 16  | 40  | < 0.1 |
| 17  | 40  | < 0.1 |
| 18  | 40  | < 0.1 |
| 19  | 40  | < 0.1 |
| 20  | 40  | < 0.1 |
| 21  | 40  | < 0.1 |
| 22  | 40  | < 0.1 |
| 23  | 40  | < 0.1 |
| 24  | 40  | < 0.1 |
| 25  | 40  | < 0.1 |
| 26  | 40  | < 0.1 |
| 27  | 40  | < 0.1 |
| 28  | 40  | < 0.1 |
| 29  | 40  | < 0.1 |
| 30  | 40  | < 0.1 |
| 31  | 40  | < 0.1 |
| 32  | 40  | < 0.1 |
| 34  | 40  | < 0.1 |
| 35  | 40  | < 0.1 |
| 36  | 40  | < 0.1 |
| 37  | 40  | < 0.1 |
| 38  | 40  | < 0.1 |
| 39  | 40  | < 0.1 |
| 40  | 40  | < 0.1 |
| 41  | 40  | < 0.1 |
| 42  | 40  | < 0.1 |
| 43  | 40  | < 0.1 |
| 44  | 40  | < 0.1 |
| 45  | 40  | < 0.1 |
| 46  | 40  | < 0.1 |
| 47  | 40  | < 0.1 |
| 48  | 40  | < 0.1 |
| 49  | 40  | < 0.1 |
| 50  | 40  | < 0.1 |
| 51  | 40  | < 0.1 |
| 52  | 40  | < 0.1 |
| 53  | 40  | < 0.1 |
| 54  | 40  | < 0.1 |
| 55  | 40  | < 0.1 |
| 56  | 40  | < 0.1 |
| 57  | 40  | < 0.1 |
| 58  | 40  | < 0.1 |
| 59  | 40  | < 0.1 |
| 60  | 40  | < 0.1 |
| 61  | 40  | < 0.1 |
| 62  | 40  | < 0.1 |
| 63  | 40  | < 0.1 |
| 64  | 40  | < 0.1 |
| 65  | 40  | < 0.1 |
| 67  | 40  | < 0.1 |
| 68  | 40  | < 0.1 |
| 69  | 40  | < 0.1 |
| 70  | 40  | < 0.1 |
| 71  | 40  | < 0.1 |
| 72  | 40  | < 0.1 |
| 73  | 40  | < 0.1 |
| 74  | 40  | < 0.1 |
| 75  | 40  | < 0.1 |
| 76  | 40  | < 0.1 |
| 77  | 40  | < 0.1 |
| 78  | 40  | < 0.1 |
| 79  | 40  | < 0.1 |
| 80  | 40  | < 0.1 |
| 81  | 40  | < 0.1 |
| 82  | 40  | < 0.1 |
| 83  | 40  | < 0.1 |
| 84  | 42  | < 0.1 |
| 85  | 46  | < 0.1 |
| 86  | 50  | < 0.1 |
| 87  | 54  | 0.1   |
| 88  | 59  | 0.3   |
| 89  | 63  | 1     |
| 90  | 67  | 1     |
| 91  | 71  | 3     |
| 92  | 75  | 5     |
| 93  | 80  | 9     |
| 94  | 84  | 14    |
| 95  | 88  | 21    |
| 96  | 92  | 30    |
| 97  | 96  | 39    |
| 98  | 101 | 53    |
| 99  | 105 | 63    |
| 100 | 109 | 73    |

## Past-Tense Marking Standard Score Conversion Tables: 9;0–9;5

**Ages 9;0–9;5 ( $N = 26$ ; boys = 15, girls = 11)**

Confidence Intervals:

68%  $\pm$  2.94

90%  $\pm$  4.84

95%  $\pm$  5.76

| Past-Tense Raw Score | Standard Score | Percentile | Past-Tense Raw Score | Standard Score | Percentile | Past-Tense Raw Score | Standard Score | Percentile |
|----------------------|----------------|------------|----------------------|----------------|------------|----------------------|----------------|------------|
| 0                    | 40             | < 0.1      | 33                   | 40             | < 0.1      | 66                   | 40             | < 0.1      |
| 1                    | 40             | < 0.1      | 34                   | 40             | < 0.1      | 67                   | 40             | < 0.1      |
| 2                    | 40             | < 0.1      | 35                   | 40             | < 0.1      | 68                   | 40             | < 0.1      |
| 3                    | 40             | < 0.1      | 36                   | 40             | < 0.1      | 69                   | 40             | < 0.1      |
| 4                    | 40             | < 0.1      | 37                   | 40             | < 0.1      | 70                   | 40             | < 0.1      |
| 5                    | 40             | < 0.1      | 38                   | 40             | < 0.1      | 71                   | 40             | < 0.1      |
| 6                    | 40             | < 0.1      | 39                   | 40             | < 0.1      | 72                   | 40             | < 0.1      |
| 7                    | 40             | < 0.1      | 40                   | 40             | < 0.1      | 73                   | 40             | < 0.1      |
| 8                    | 40             | < 0.1      | 41                   | 40             | < 0.1      | 74                   | 40             | < 0.1      |
| 9                    | 40             | < 0.1      | 42                   | 40             | < 0.1      | 75                   | 40             | < 0.1      |
| 10                   | 40             | < 0.1      | 43                   | 40             | < 0.1      | 76                   | 40             | < 0.1      |
| 11                   | 40             | < 0.1      | 44                   | 40             | < 0.1      | 77                   | 40             | < 0.1      |
| 12                   | 40             | < 0.1      | 45                   | 40             | < 0.1      | 78                   | 40             | < 0.1      |
| 13                   | 40             | < 0.1      | 46                   | 40             | < 0.1      | 79                   | 40             | < 0.1      |
| 14                   | 40             | < 0.1      | 47                   | 40             | < 0.1      | 80                   | 40             | < 0.1      |
| 15                   | 40             | < 0.1      | 48                   | 40             | < 0.1      | 81                   | 40             | < 0.1      |
| 16                   | 40             | < 0.1      | 49                   | 40             | < 0.1      | 82                   | 40             | < 0.1      |
| 17                   | 40             | < 0.1      | 50                   | 40             | < 0.1      | 83                   | 40             | < 0.1      |
| 18                   | 40             | < 0.1      | 51                   | 40             | < 0.1      | 84                   | 40             | < 0.1      |
| 19                   | 40             | < 0.1      | 52                   | 40             | < 0.1      | 85                   | 40             | < 0.1      |
| 20                   | 40             | < 0.1      | 53                   | 40             | < 0.1      | 86                   | 40             | < 0.1      |
| 21                   | 40             | < 0.1      | 54                   | 40             | < 0.1      | 87                   | 40             | < 0.1      |
| 22                   | 40             | < 0.1      | 55                   | 40             | < 0.1      | 88                   | 40             | < 0.1      |
| 23                   | 40             | < 0.1      | 56                   | 40             | < 0.1      | 89                   | 42             | < 0.1      |
| 24                   | 40             | < 0.1      | 57                   | 40             | < 0.1      | 90                   | 47             | < 0.1      |
| 25                   | 40             | < 0.1      | 58                   | 40             | < 0.1      | 91                   | 53             | 0.1        |
| 26                   | 40             | < 0.1      | 59                   | 40             | < 0.1      | 92                   | 59             | 0.3        |
| 27                   | 40             | < 0.1      | 60                   | 40             | < 0.1      | 93                   | 65             | 1          |

|    |    |       |    |    |       |     |     |    |
|----|----|-------|----|----|-------|-----|-----|----|
| 28 | 40 | < 0.1 | 61 | 40 | < 0.1 | 94  | 70  | 2  |
| 29 | 40 | < 0.1 | 62 | 40 | < 0.1 | 95  | 76  | 5  |
| 30 | 40 | < 0.1 | 63 | 40 | < 0.1 | 96  | 82  | 12 |
| 31 | 40 | < 0.1 | 64 | 40 | < 0.1 | 97  | 87  | 19 |
| 32 | 40 | < 0.1 | 65 | 40 | < 0.1 | 98  | 93  | 32 |
|    |    |       |    |    |       | 99  | 99  | 47 |
|    |    |       |    |    |       | 100 | 105 | 63 |
